1 **WFD ecological status indicator shows poor**  
2 **correlation with flow parameters in a large**  
3 **Alpine catchment**

4

5 **Larsen Stefano<sup>a,b\*</sup>, Bruno Maria Cristina<sup>b</sup>, Zolezzi Guido<sup>a</sup>**

6

7

8 <sup>a</sup> Department of Civil, Environmental and Mechanical Engineering, University of  
9 Trento, I-38123 Trento, Italy

10 <sup>b</sup> Department of Sustainable Agro-ecosystems and Bioresources, Research and  
11 Innovation Centre, Fondazione Edmund Mach, Via E. Mach 1, I-38010 San Michele  
12 all'Adige, Italy

13

14 \*Corresponding author.

15 email: [larsen.stefano@gmail.com](mailto:larsen.stefano@gmail.com); [stefano.larsen@unitn.it](mailto:stefano.larsen@unitn.it)

16

17

18

19

20

21

22

23

24

25

26

27

28

29

30

31

32

33

34

35

## 36 **Summary**

37

38 Since the implementation of the Water Framework Directive, the ecological status of  
39 European running waters has been evaluated using a set of harmonised ecological  
40 indicators that should guide conservation and restoration actions. Among these, the  
41 restoration of the natural flow regime (ecological flows) is considered indispensable  
42 for the achievement of the good ecological status, and yet the sensitivity of the  
43 current biological indicators to hydrologic parameters remains understudied. The  
44 Italian Star\_ICMi well represents other similar WFD indicators; it is a  
45 macroinvertebrate-based multimetric index officially adopted to assess the ecological  
46 status of running waters at the national level. Recent legislation has also included the  
47 Star\_ICMi as one of the indicators used to assess and prescribe ecological flows in  
48 river reaches regulated by water abstraction. However, the relationship between river  
49 hydrology and the Star\_ICMi index is so far virtually unknown. Using data from the  
50 Trentino - Alto Adige Alpine region, we first assessed the relationship between the  
51 Star\_ICMi and synthetic descriptors of the physico-chemical (LIMeco) and  
52 morphological (MQI) status of respectively 280 and 184 river reaches. Then, we  
53 examined the relation between the Star\_ICMi and a set of ecologically-relevant  
54 hydrologic parameters derived from discharge time-series measured at 21  
55 hydrometric stations, representing both natural and regulated river reaches. Although  
56 the Star\_ICMi showed significant and linear relationships with the physico-chemical  
57 character and, slightly, with the morphological quality of the reaches, its response to  
58 flow parameters appeared weak or non-existent when examined with linear models.  
59 Mixed quantile regressions allowed the identification of flow parameters that  
60 represented limiting factors for macroinvertebrate communities and the associated  
61 Star\_ICMi scores. In particular, the index showed 'negative floors' where lower  
62 values were observed in reaches with large temporal variation in flow magnitude as  
63 well as frequent low and high flow events. The modelled quantiles also tracked the  
64 transition of the index from acceptable to unacceptable conditions.  
65 The results suggest that while the central tendency of the Star\_ICMi index is not  
66 strongly influenced by river flow character, some key flow parameters represent  
67 limiting factors that allow the index to reach its lowest values, eventually 'pushing' the  
68 site towards unacceptable ecological conditions. The identification of limiting flow  
69 parameters can aid the setting of hydrologic thresholds over which ecological  
70 impairment is likely to occur. Overall, however, results imply caution is needed in  
71 using biological indicator like the Star\_ICMi for the quantitative assessment and  
72 design of ecological flows.

73

74 **Keywords:** Bioindicators; STAR\_ICMi; Water Framework Directive; Ecological flows;

75 Quantile regression

76

77

## 78 **1. Introduction**

79

80 The Water Framework Directive (WFD; European Commission, 2000) is the  
81 principal legislative framework concerning the management and protection of  
82 European waters. Through the definition of common approaches, the WFD  
83 requires Member States to achieve ‘good ecological status’ objectives for  
84 water bodies. Among the quality elements guiding the status classification of  
85 streams and rivers, the hydrologic regime (the quantity and dynamics of river  
86 flow, sensu Poff et al., 1997) is considered central in supporting the biological  
87 elements and thus the achievement of good ecological status. Although not  
88 explicitly mentioned in the WFD, the concept of ‘ecological flow’ (E-flow) is  
89 increasingly considered and implemented in many river basin management  
90 plans. Within the EU context, E-flows are defined as “an hydrologic regime  
91 consistent with the achievement of the environmental objectives of the WFD  
92 in natural surface water bodies”, and specific recommendations on the  
93 definition of E-flows and their use in status assessment were also recently  
94 provided (Guidance 31 by the European Commission; WFD CIS, 2015). In  
95 particular, the Guidance 31 states that the “Ecological impacts of hydrological  
96 alterations and their significance should be ultimately assessed with biological  
97 indicators built on monitoring data that are specifically sensitive to  
98 hydrological alterations”.

99 The use of biological indicators has a long tradition in freshwater ecology  
100 where fish and macroinvertebrate based indices are widely used to define the  
101 ecological integrity of waterbodies (e.g. De Pauw et al., 2006; Rosenberg and  
102 Resh, 1993). In Europe, after the implementation of the WFD, there has been  
103 substantial effort to harmonise the different eco-bio-indicators across EU  
104 Countries (e.g for macroinvertebrates: Hering et al., 2004; Verdonshot and  
105 Moog, 2006). These indicators are used to define the ecological status of  
106 running waters and guide conservation and restoration effort.

107 However, although river organisms are clearly influenced by the hydrology,  
108 most present bioindicators were developed to emphasise organisms  
109 sensitivity to organic pollution and habitat degradation, and hence appear  
110 rather insensitive to hydrological alterations (Friberg, 2014; Poff and  
111 Zimmerman, 2010). Although some countries developed hydrologically-  
112 sensitive indicators based on flow preference of benthic invertebrates (UK:  
113 Extence et al., 1999; NZ: Greenwood et al., 2016), these are not yet  
114 implemented in the WFD. The implementation of evidence-based E-flows  
115 should be based on a sound understanding of the relation between river  
116 ecology (e.g. biodiversity) and flow characteristics (flow-ecology relationship:  
117 Rosenfeld, 2017; Stewart-Koster et al., 2014), ultimately requiring a  
118 fundamental association between water quantity and ecological quality. Yet,  
119 more effort has been dedicated internationally towards the definition and  
120 modelling of E-flows and water allocation for regulated rivers (e.g. residual  
121 flow) compared to the quantification of flow-ecology relationships (Davies et  
122 al., 2014; Tonkin et al., 2014). The natural flow paradigm is at the heart of the  
123 E-flow concept in that modified flow regimes should incorporate the natural  
124 variability in terms of flow magnitude, frequency, duration, timing and rate of  
125 change (Poff et al., 1997). Since the publication of the Nature Conservancy's  
126 Indicator of Hydrologic Alteration (IHA; Richter et al., 1997), parameters  
127 quantifying the different components of the flow regime have been widely  
128 used to characterise natural flow regimes and its alterations as well as to  
129 identify 'ecologically relevant' hydrological drivers (e.g. Worrall et al., 2014).  
130 Similarly, flow-ecology studies quantifying the influence of individual flow  
131 parameters on in-stream communities have been flourishing steadily in recent  
132 times (Tonkin et al., 2014); however, those that specifically assessed the  
133 response of multi-metric indicators such as those adopted by the WFD are  
134 scarce (Belmar et al., 2018; Monk et al., 2006; Nebra et al., 2014). This is  
135 surprising considering the emphasis given by the WFD on water abstraction,  
136 ranked as the second most common pressure on EU water bodies (WFD CIS,  
137 2015). Therefore, assessing how current WFD biological indicators respond to  
138 the different components of the flow regime is a prerequisite for managing E-  
139 flows and developing more specific indicators.

140

141 Here we used a framework based on flow-ecology relationship to investigate  
142 the performance of a WFD bio-indicator to characterise hydrologic regimes  
143 and their alterations. As a case study, we used the macroinvertebrate-based  
144 Star\_ICMi (Buffagni and Erba, 2007) officially adopted by the Italian legislation  
145 as the Biological Quality Element to guide the classification of running waters  
146 according to the WFD. The index is based on six normalized and weighted  
147 metrics also adopted by other EU Countries (Buffagni et al., 2006), and  
148 includes taxonomic richness and diversity, as well as taxa sensitivity to  
149 organic pollution. Alongside other purely hydrological and habitat-based eco-  
150 hydraulic indicators, the Star\_ICMi also represents one of the methods  
151 adopted by the Italian law for the determination of E-flows in regulated rivers.  
152 However, since its official introduction in Italy, the few available studies have  
153 indicated a rather low sensitivity of the Star\_ICMi to discharge alterations,  
154 especially where these are not coupled with a deterioration of water-quality,  
155 as it often occurs in Alpine and perialpine streams affected by hydropower  
156 regulation (Laini et al., 2018; Quadroni et al., 2017; Salmaso et al., 2018).  
157 Recently, some critical issues in using the STAR\_ICMi to determine E-flows  
158 have been raised based mainly on the apparent lack of a direct relationship  
159 between the index and river discharge (Spitale and Bruno, 2018).  
160 Surprisingly, despite the specific requirements of the WFD, so far the  
161 relationship between the Star\_ICMi and different flow parameters describing  
162 river discharge has been virtually unexplored in Italy (but see Laini et al.,  
163 2018). However, investigating how this ecological quality indicator responds to  
164 flow characteristics is indispensable to evaluate its use within the context of E-  
165 flows.

166

167 As a representative case study for the Italian Alpine area we analysed data  
168 from the Trentino-Alto Adige region where the main alterations of the natural  
169 flow regime are essentially related to hydropower schemes (Zolezzi et al.,  
170 2009). The study has two main objectives: first, we used the region-wide  
171 dataset to investigate the responses of the STAR\_ICMi to the physico-  
172 chemical and morphological character of river reaches, as described by  
173 synthetic WFD quality elements. Second, by identifying a set of monitoring  
174 stations for which river discharge time-series were available, we quantified the

175 relationship between the Star\_ICMi and a set of ecologically-relevant flow  
176 parameters, using both linear and quantile regressions. Because the latter  
177 analysis was based on limited data points, we did not attempt to disentangle  
178 and rank the individual effect of multiple environmental factors besides  
179 hydrologic regime (e.g. as in Booker et al., 2015). Instead, we appraised the  
180 extent to which other environmental covariates (i.e., anthropogenic stressors)  
181 might have influenced the observed flow-ecology relationship using the  
182 Procrustes analysis. Specifically, we tested if the correlation between  
183 hydrological parameters and macroinvertebrate communities increased with  
184 altitude where the influence of other anthropogenic stressors (e.g. nutrients,  
185 local land use) appeared to be weaker.

186

## 187 **2. Methods**

188

### 189 *2.1 Study area*

190 The Trentino-Alto Adige is a region in Northeast Italy with a surface of c.  
191 13.000 Km<sup>2</sup> and a population of c. 900.000 inhabitants. The region mostly lays  
192 within the Alps with more than 75% of its territory above 1000 m of altitude.  
193 The Adige River and its tributaries form the largest river basin occupying  
194 about 80% of its territory. Minor river basins in the region included in the study  
195 were the Sarca, Brenta, Chiese and Vanoi. A total of 280 study reaches were  
196 included, which form the monitoring network of the Environmental Protection  
197 Agencies of the Provinces of Trento and Bolzano, across an altitudinal range  
198 of 175 - 1800 m a.s.l (Fig. 1).

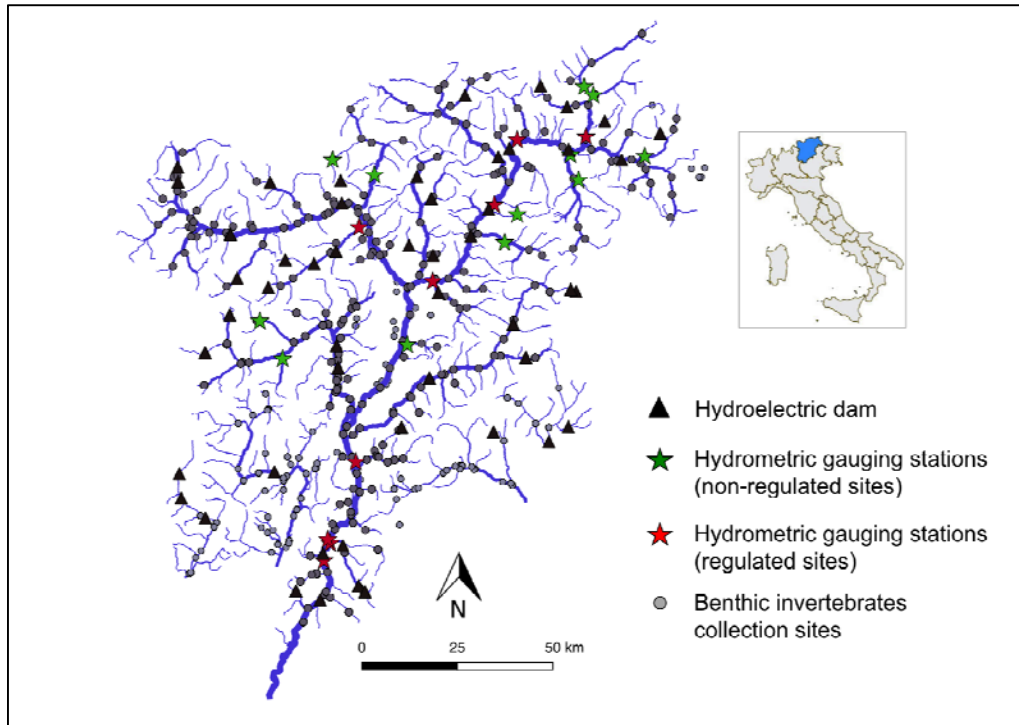

199

200 **Figure 1.** Map of the main river networks in the Trentino-Alto Adige region in NE Italy  
201 and the analysed gauging stations (stars) and biological sampling stations (dots).  
202

## 203 *2.2. Data collection and computation of the WFD indicators*

204 Data used in the present study come from the institutional monitoring  
205 programme of the Environmental Protection Agencies of the Provinces of  
206 Trento and Bolzano. Benthic macroinvertebrates were collected in 280 stream  
207 reaches between 2009 and 2014 (Fig. 1). Sampling followed the multi-habitat  
208 proportional technique according to the AQEM protocol (Hering et al., 2004),  
209 in which 10 replicate Suber samples (0.1m<sup>2</sup>) were distributed along the reach  
210 proportionally to the different micro-habitat types present. Specimens were  
211 identified to genus and family levels as required for the calculation of the  
212 Star\_ICMi. The index is computed combining sub-metrics related to the  
213 tolerance, richness and diversity of the different macroinvertebrate taxa  
214 observed (Appendix A in Supplementary Material).

215 In most of these biological sampling sites, data for the formulation of two  
216 additional WFD indicators were also gathered. To assess the physico-  
217 chemical quality element, we used the LIMeco index (“Livello di Inquinamento

218 dai Macrodescrittori per lo stato ecologico”), which scores river water quality  
219 in terms of dissolved oxygen and nutrient concentration (Azzellino et al.,  
220 2015), with data for 280 reaches. The morphological quality was assessed  
221 with the Morphological Quality Index (MQI; Rinaldi et al., 2013), with data  
222 available for a subset of 184 reaches. The MQI provides a score to the  
223 morphological quality of a river reach based on three main elements:  
224 geomorphological functionality (accounting for longitudinal and lateral  
225 continuity of river processes, channel patterns, river bed structure and  
226 substratum, riparian vegetation), degree of artificiality (e.g. presence of local  
227 and remote sources of hydro-morphological alterations, such as sediment  
228 mining, levees and embankments, artificial reservoirs), and observed recent  
229 channel adjustments.

230 Hydrological information was available from gauging stations located along  
231 the Adige River network (managed by the Ufficio Dighe for the Autonomous  
232 Province of Trento, and by the Ufficio Idrografico for the Autonomous  
233 Province of Bolzano), and we selected 21 gauged stations (Table 1) in  
234 proximity to biological sampling site (<5km stream distance, no influence of  
235 major tributaries) so as to pair hydrological and ecological data (Fig. 1).

236 Overall discharge time-series differed in length among stations, but  
237 continuous flow records were available for all stations from 2007. This allowed  
238 us to associate 1-year antecedent flow series with each biological sample.

239  
240  
241



| Station code | River       | Lat        | Long      | Flow regulation | Elevation (m a.s.l.) | Stream order | LIMeco | MQI  | Mean annual discharge (m <sup>3</sup> /s) | Flow regime  |
|--------------|-------------|------------|-----------|-----------------|----------------------|--------------|--------|------|-------------------------------------------|--------------|
| N_Groe       | Rio Gardena | 5161409.89 | 702603.22 | No              | 1190                 | 3            | 0.96   | NA   | 3.42                                      | Pluvio-nival |
| N_Isa13      | Isarco      | 5171220.03 | 699902.87 | Reg             | 763                  | 4            | 0.86   | NA   | 63.36                                     | Nivo-glacial |
| N_Vil15      | Rio Funes   | 5168758.95 | 705884.66 | No              | 1235                 | 1            | 0.91   | NA   | 0.90                                      | Nivo-pluvial |
| O_Ahr2       | Aurino      | 5202120.25 | 723398.50 | No              | 1223                 | 2            | 0.92   | 0.59 | 6.26                                      | Nivo-glacial |
| O_Gad22      | Gadera      | 5184328.69 | 719813.69 | No              | 830                  | 3            | 0.88   | NA   | 8.95                                      | Pluvio-nival |
| O_Gsi15      | Rio Casies  | 5183969.79 | 739258.79 | No              | 1191                 | 2            | NA     | NA   | 2.55                                      | Nivo-pluvial |
| O_Rei13      | Rio Riva    | 5199898.44 | 725812.58 | No              | 853                  | 2            | 0.91   | 0.66 | 4.81                                      | Nivo-pluvial |
| O_Svg9       | San Vigilio | 5177748.72 | 721932.96 | No              | 1148                 | 2            | 0.92   | NA   | 2.00                                      | Nivo-pluvial |
| PR000017     | Leno        | 5082814.51 | 656927.22 | Reg             | 175                  | 2            | 0.88   | 0.24 | 4.86                                      | Pluvio-nival |
| R14_Pas      | Passirio    | 5179047.63 | 668502.74 | No              | 490                  | 3            | 0.79   | 0.56 | 11.76                                     | Nivo-pluvial |
| R5_Pfe       | Rio Plan    | 5183012.70 | 657564.60 | No              | 1798                 | 1            | 0.9    | 0.85 | 2.14                                      | Nivo-pluvial |
| S_Egg11      | Rio Ega     | 5151257.93 | 683769.13 | Reg             | 305                  | 3            | 0.82   | NA   | 2.46                                      | Pluvio-nival |
| S_Zwa15      | Rio Nero    | 5134679.82 | 677086.61 | No              | 280                  | 2            | 0.74   | NA   | 0.25                                      | Pluvio-nival |
| SD000147     | Adige       | 5083835.68 | 656296.52 | Reg             | 228                  | 5            | 0.74   | 0.55 | 217.18                                    | Nivo-glacial |
| SD000149     | Adige       | 5078284.74 | 655273.32 | Reg             | 183                  | 5            | NA     | NA   | 81.74                                     | Nivo-glacial |
| SG000002     | Adige       | 5104054.75 | 663619.22 | Reg             | 289                  | 5            | 0.76   | 0.52 | 201.23                                    | Nivo-glacial |
| VP000004     | Rabies      | 5140884.30 | 638493.02 | No              | 1375                 | 2            | 0.93   | 0.63 | 2.24                                      | Nivo-pluvial |
| VP000026     | Meledrio    | 5131002.37 | 644473.83 | No              | 1022                 | 2            | 0.92   | 0.74 | 1.58                                      | Nivo-nival   |
| W_Fal22      | Valsura     | 5165374.96 | 664469.30 | Reg             | 299                  | 2            | 0.89   | NA   | 5.51                                      | Pluvio-nival |
| Z_Ahr10      | Aurino      | 5189045.77 | 723881.31 | Reg             | 823                  | 3            | NA     | NA   | 21.08                                     | Nivo-glacial |
| Z_Rie8       | Rienza      | 5188208.31 | 705884.66 | Reg             | 730                  | 4            | NA     | NA   | 46.96                                     | Pluvio-nival |

242  
243

**Table 1.** Main characteristics of the hydrometric gauging stations used to derive flow parameters from discharge time-series.

244  
245  
246  
247  
248

### 2.3 Data analyses

249 Across the 280 monitoring sites, macroinvertebrate sampling occurred  
250 multiple times between 2009 and 2014 (3-10 times per site). We therefore  
251 calculated the mean Star\_ICMi value to characterise the biological quality of  
252 each site. Similarly, multiple values of the LIMeco and MQI indices were  
253 averaged per site. For the first goal (relation among WFD quality indicators),  
254 we used ordinary least square regressions to relate the Star\_ICMi index with  
255 the LIMeco and MQI indices.

256

257 For our second goal (flow-ecology relationship), we used the available  
258 discharge time-series to derive 21 flow parameters (Table 2) based on daily  
259 flow values (normalised relative to annual means). Following previous studies  
260 (Belmar et al., 2018; Worrall et al., 2014) two temporal scales were  
261 considered: 1-year and 60-days preceding the collection of benthic  
262 macroinvertebrates, thus representing the influence of both long and short-  
263 term antecedent hydrologic conditions. Flow parameters were derived  
264 following Indicator of Hydrologic Alteration approach (IHA; Richter et al.,  
265 1997) using the 'IHA' implementation in R (R Core Team, 2017). The flow

266 parameters represented ecologically relevant hydrologic characteristics  
267 regarding magnitude (e.g. 1-7-90 days maximum and minimum flow),  
268 frequency and duration (e.g. number and duration of low and high pulses),  
269 rate of change and variation (e.g. rise and fall rates, CV). No automatic  
270 selection of flow parameters or synthesis was performed (e.g. PCA reduction),  
271 so as to avoid the exclusion of relevant parameters, and to facilitate the  
272 interpretation of results (e.g. Schneider and Petrin, 2017). In addition, the  
273 overall number of parameters included was small (compared to most  
274 publication where >100 metrics are used) and represented arguably the  
275 minimum set of ecologically relevant flow characteristics. Parameters related  
276 to the timing of flow events were not calculated, because the computation  
277 would require longer (multiple-years) flow time-series, and because  
278 macroinvertebrate collection was conducted over different months of the year.  
279 Star\_ICMi values from repeated observations in time (multiple biological  
280 samples per site) were not averaged in this case, but were all included for a  
281 total of 80 samples, each paired with 1-year hydrological information. This  
282 allowed us to increase statistical power and aid the visual interpretation of  
283 complex relationships. The longitudinal structure of the data was accounted  
284 for by including 'site' as random factor in linear mixed-models relating the  
285 Star\_ICMi to flow parameters, using the nlme package in R (Pinheiro et al.,  
286 2018). The proportion of variance explained by the fixed factors (i.e. flow  
287 parameters) was expressed as marginal  $R^2$  using the r.squaredGLMM  
288 function in the MuMin package (Bartoń, 2018).  
289

| Flow class                   | Flow parameter    | Description                                                                |
|------------------------------|-------------------|----------------------------------------------------------------------------|
| Magnitude                    | d1_Day_Min        | Minimum flow, 1 day mean                                                   |
|                              | d3_Day_Min        | Minimum flow, 3 days mean                                                  |
|                              | d7_Day_Min        | Minimum flow, 7 days mean                                                  |
|                              | d30_Day_Min       | Minimum flow, 30 days mean                                                 |
|                              | d90_Day_Min       | Minimum flow, 90 days mean                                                 |
|                              | d1_Day_Max        | Maximum flow, 1 day mean                                                   |
|                              | d3_Day_Max        | Maximum flow, 3 days mean                                                  |
|                              | d7_Day_Max        | Maximum flow, 7 days mean                                                  |
|                              | d30_Day_Max       | Maximum flow, 30 days mean                                                 |
|                              | d90_Day_Max       | Maximum flow, 90 days mean                                                 |
|                              | Base_index        | 7 days minimum / mean flow                                                 |
| Frequency and duration       | Low_pulse_number  | Number of flow events below 25th percentile                                |
|                              | High_pulse_number | Number of flow events above 75th percentile                                |
|                              | Low_pulse_length  | Number of days below 25th percentile                                       |
|                              | High_pulse_length | Number of days above 75th percentile                                       |
| Rate of change and variation | Rise_rate         | Median of all positive differences between consecutive values              |
|                              | Fall_rate         | Median of all negative differences between consecutive values              |
|                              | Reversals         | Number of times flow period switches from rising to falling and vice-versa |
|                              | max_min           | Maximum flow - minimum flow                                                |
|                              | CV                | Coefficient of variation (SD/mean)                                         |
|                              | CVmean30d         | CV, mean over 30 days period                                               |

290

291 **Table 2** - Flow parameters derived from daily flow-series included in the analyses

292

293 The 21 gauged reaches represented rivers with natural flow regime as well as  
 294 reaches regulated by upstream hydropower schemes. These were all  
 295 included in the analyses, because i) we were interested in assessing the  
 296 relation between the Star\_ICMi and specific flow parameters rather than  
 297 quantifying differences among river reaches and ii) we wanted to include the  
 298 full range of flow parameters expected in the region. Nonetheless, for aiding  
 299 visual interpretation, regulated and non-regulated reaches were differently  
 300 identified in the plots.

301 In our analytical approach, we recognise that streamflow conditions are  
 302 among the many factors that influence macroinvertebrate assemblages  
 303 across the study sites. These include, for instance, water quality parameters  
 304 and temperature, resource availability and riverbed morphology among others  
 305 (Allan, 1995). However, streamflow characteristics in some reaches can  
 306 represent a limiting factor for macroinvertebrates, where other stream features  
 307 would allow different density or diversity to be observed. These limits can be  
 308 considered as either 'ceilings' or 'floors' when the biological metric shows  
 309 upper or lower limits as a function of a flow parameter, respectively. In these  
 310 cases, the biological metric is unlikely to display a central response to flow  
 311 parameters and ordinary regressions are not suited to quantify the limits  
 312 (Konrad et al., 2008; Lancaster and Belyea, 2006). Conversely, quantile

313 regressions allow modelling the effect of a predictor variable over different  
314 quantiles of the dependent variable. In other words, the model fits the 'limiting  
315 response' of the  $y$  variable by identifying its conditional quantiles with respect  
316 to the predictor variable  $x$ . When quantifying the 80th percentile, for example,  
317 80% of the values of  $y$  are equal or less than the modelled function of  $x$  (Cade  
318 and Noon, 2003). In the present study, we assessed both the central and  
319 limiting response of the Star\_ICMi index to the different flow parameters. We  
320 used linear mixed-models to account for repeated sampling within site using  
321 the 'nlme' package in R. For the quantile approach we employed a recently  
322 developed algorithm for linear quantile mixed-models implemented in the  
323 'lqmm' package in R (Geraci, 2014).

324  
325 Lastly, we used Procrustes analysis to appraise the extent to which other  
326 confounding factors may influence the flow-ecology relationship in the study  
327 area. Similarly to Mantel test, Procrustes analysis quantifies the association  
328 between multivariate data matrices, but it also provides a vector of residuals  
329 that represent the differences between homologous observations (i.e. sites,  
330 samples) across the two matrices (Lisboa et al., 2014). The residuals vector is  
331 a measure of the fit between the two matrices and can be used to further  
332 understand how the matrices are related. For example, the Procrustes  
333 residuals can be used to appraise whether another factor influenced the  
334 degree of matching between observations. Here we used Procrustes analysis  
335 to quantify the match between the matrix of macroinvertebrate communities  
336 (*samples x taxa*) and the matrix of flow parameters (*samples x parameters*).  
337 Then, we extracted the residuals vector and used it to investigate the  
338 influence of other environmental covariates. Specifically we used altitude  
339 (ranging 175 - 1800 m a.s.l.) as a proxy for many correlated factors and  
340 stressors such as temperature, land-use and water quality, and a linear  
341 mixed-models was used to relate the Procrustes residuals vector with altitude.  
342 Procrustes analysis requires the same dimensionality between multivariate  
343 matrices. Therefore, we first harmonised the dimensionality of each matrix  
344 using Principal Component Analysis (PCA) by keeping the first five  
345 components for each matrix. Macroinvertebrate densities were Hellinger-  
346 transformed prior to PCA (Lisboa et al., 2014).

347

### 348 **3. Results**

349

350 The Star\_ICMi index showed linear and relatively strong ( $R^2=0.36$ ,  $P < 0.0001$ ;  
351  $n=280$ ) correlations with the LIMeco index and, to a lesser extent, with the  
352 MQI ( $R^2=0.2$ ,  $P < 0.0001$ ;  $n=184$ ) (Fig. 2).

353 Only three of the flow parameters calculated from 1-year flow series were  
354 significantly (at  $P < 0.05$ ) and negatively correlated with the Star\_ICMi  
355 according to linear mixed models, namely CV\_mean30d (marginal  $R^2=0.3$ ),  
356 d1\_Day\_Max (marginal  $R^2=0.1$ ) and max-min (marginal  $R^2=0.1$ ) (Fig. S1 in  
357 SM; see description of the parameters in Table 1). No significant correlations  
358 were observed when flow parameters were derived from 60-days flow series  
359 preceding the macroinvertebrates collection (Fig.S2 in SM).

360

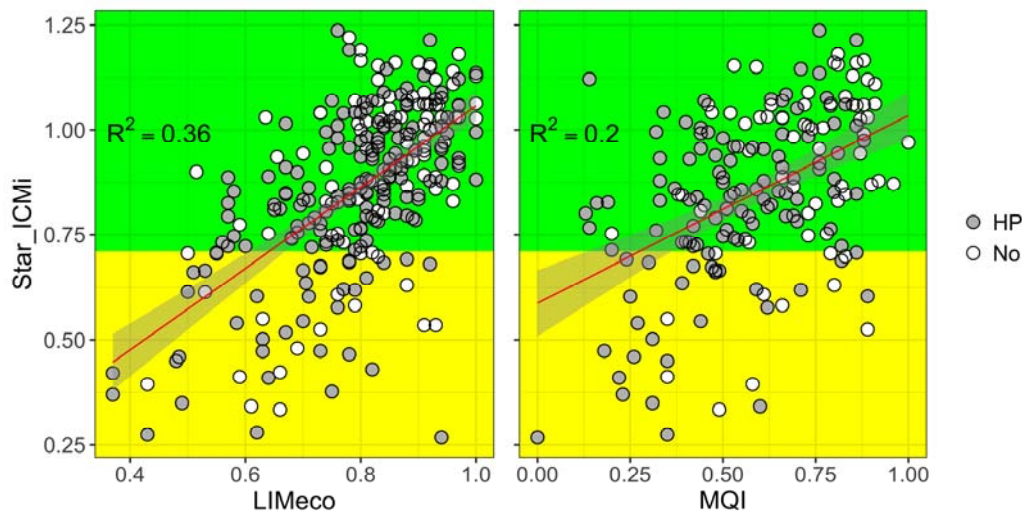

362

363 **Figure 2-** Regression of the Star\_ICMi with LIMeco and MQI. Red lines = linear fit;  
364 grey areas = 95% CI. Background colours denote threshold between acceptable  
365 (green) and unacceptable (yellow) conditions (sensu WFD). Grey circles = reaches  
366 affected by hydropower upstream (HP); white circles = reaches not affected by  
367 hydropower (No)

368

369 Conversely, the use of quantile regressions allowed the identification of  
370 additional flow parameters that appeared to limit the scores of the Star\_ICMi  
371 (Fig. 3). In particular, peak flows (d1\_Day\_Max), the number of low and high

372 pulses as well as parameters related to flow variation (CV, max\_min)  
373 represented 'negative floors', which led the Star\_ICMi below unacceptable  
374 conditions. Put in other words, lower values of the aforementioned flow  
375 parameters limited the minimum scores of the Star\_ICMi.  
376 When flow parameters were derived from 60-days flow time-series, the  
377 influence of low and high flow pulse number remained significant, while the  
378 effect of hydrologic reversals became apparent, also in the form of a 'negative  
379 floor' (Fig. 4). That is, the minimum scores of the Star\_ICMi were observed in  
380 reaches characterised by frequent hydrologic reversals. At this shorter time-  
381 scale, the effect of daily rate of change in flow also became apparent, with a  
382 'negative floor' observed with Rise\_rate (Fig.4).  
383  
384

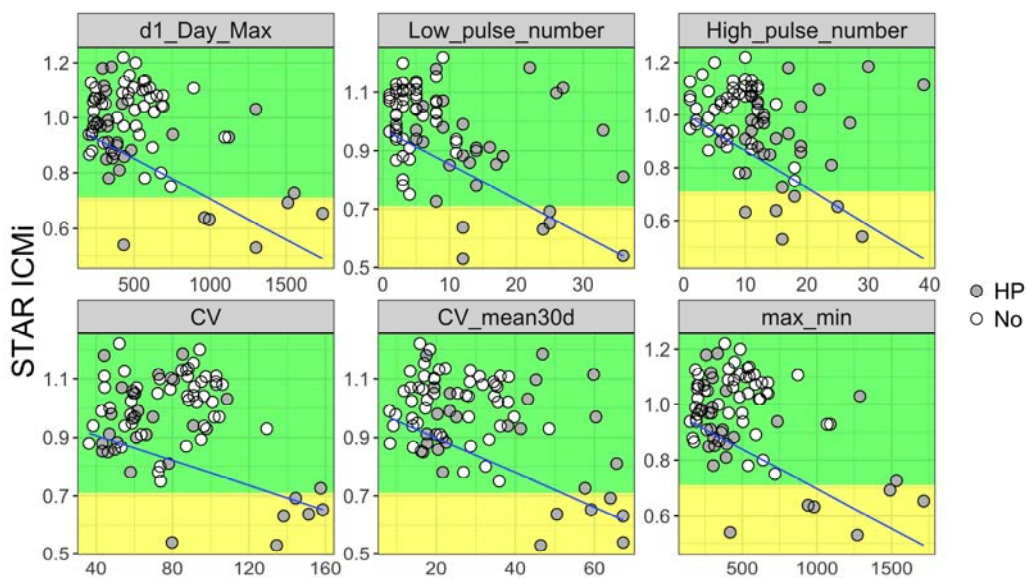

385  
386

387 **Figure 3-** The Star\_ICMi vs IHA metrics based on flow time-series from 1-year  
388 preceding the biological sampling. Blue line indicates significant mixed quantile  
389 regression at  $q=0.2$ . Significance levels are at  $P<0.01$  for all parameters except for  
390 CV at  $P=0.04$ . Background colours denote threshold between acceptable (green) and  
391 unacceptable (yellow) conditions (sensu WFD). Grey circles = reaches affected by  
392 hydropower upstream (HP); white circles = reaches not affected by hydropower (No)  
393  
394  
395  
396

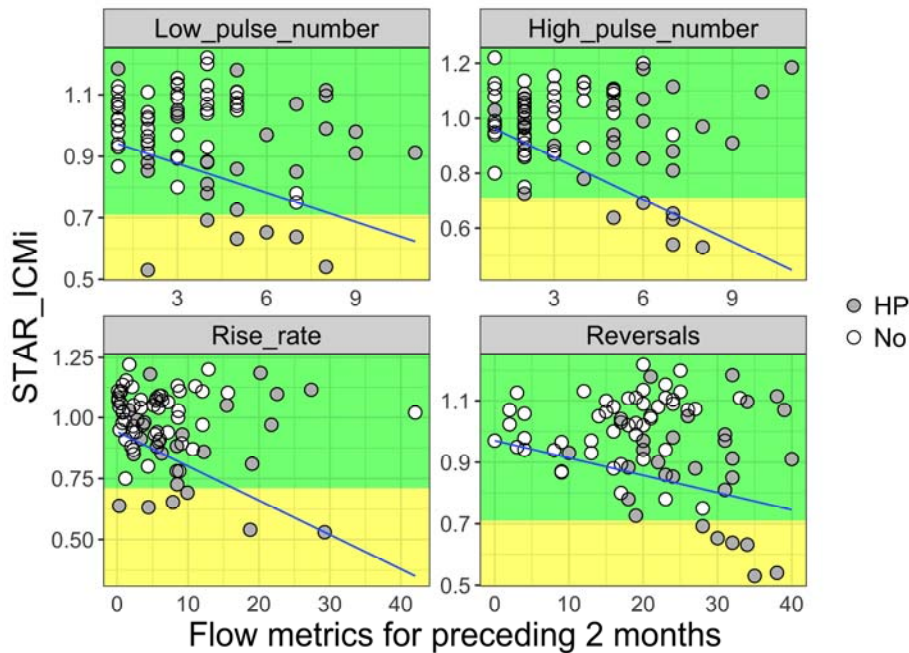

397  
398

399 **Figure 4-** Star\_ICMi vs IHA metrics based on flow series from 2 months preceding  
400 the biological sampling. Blue line indicates significant quantile regression at  $q=0.2$ .  
401 Significance levels are at  $P<0.05$ . Background color denotes threshold between  
402 acceptable (green) and unacceptable (yellow) conditions (sensu WFD). Grey circles  
403 = reaches affected by hydropower upstream (HP); white circles = reaches not  
404 affected by hydropower (No)

405  
406

407 Our study reaches encompassed a wide altitudinal range, which potentially  
408 acted as a confounding factor in the analysis of flow-ecology relationships as  
409 altitude was related to changes in the main physico-chemical parameters and  
410 local land use across the study reaches (Fig. S3 in SM). In fact, the Star\_ICMi  
411 index increased linearly with altitude (Fig 5A; mixed-model marginal  $R^2=0.2$ ,  
412  $P=0.01$ ), and most of the regulated river reaches occurred at lower elevations.  
413 The residuals vector from the Procrustes analysis associating the matrices of  
414 flow parameters and macroinvertebrate communities declined with altitude  
415 (Fig. 5B; mixed-model marginal  $R^2=0.15$ ,  $P=0.04$ ), indicating a significant and  
416 negative effect of altitude. These results indicate that the match between the  
417 biota (taxonomic matrix) and the hydrological parameters was stronger in

418 higher-altitude locations, likely because the influence of confounding stressors  
419 was weaker.

420

421

422

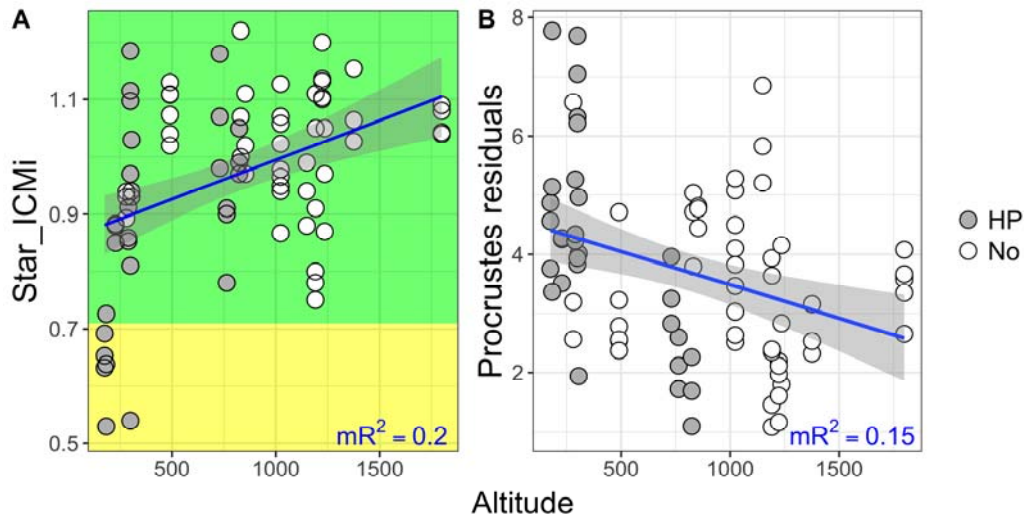

423

424 **Fig. 5** - Relation between the Star\_ICMi (A) and Procrustes residual (B) with altitude.

425 Legend as in Fig. 3 and 4.

426

427

428

#### 429 **4. Discussion**

430 We used monitoring data from a large Alpine river network to assess the  
431 relationship between WFD quality elements, and the response of the official

432 Italian macroinvertebrate-based indicator to measured hydrological

433 parameters.

434 The Star\_ICMi showed a relatively strong relation with the physico-chemical  
435 character of the river reaches, as expressed by the LIMeco index. This was  
436 expected, as stream macroinvertebrates are known to be particularly sensitive  
437 to water quality parameters (e.g. Friberg et al., 2010; Guilpart et al., 2012).

438 Moreover, the LIMeco index specifically reflects the concentration of organic  
439 pollutants (nitrates and phosphates), to which the Star\_ICMi is designed to  
440 respond (Quadroni et al., 2017). Parallel findings were recently reported by

441 Azzellino et al. (2015) for the nearby Lombardy region (northern Italy), where



442 water quality, as expressed by the LIMeco scores, explained c. 50% of the  
443 variation in the Star\_ICMi across a range of river reaches with similar  
444 environmental settings as those studied here.

445 The influence of rivers' morphological features on benthic invertebrates, as  
446 expressed by the MQI, was also significant, but apparently weaker. The MQI  
447 reflects the integrity of both channel and riparian habitat that can influence in-  
448 stream organisms in multiple ways, for instance by providing refugia and  
449 resources (Matthaei et al., 2000; Naiman and Décamps, 1997). Hence, our  
450 results suggest that across the Trentino-Alto Adige region, physico-chemical  
451 water quality was the main determinant of macroinvertebrate community  
452 integrity as measured by the STAR\_ICMi, which was only secondarily affected  
453 by riparian and in-stream morphological features. Other studies in Italy and  
454 elsewhere indicated that substratum and riparian characteristics mostly  
455 influenced the functional composition (e.g. feeding habits) of benthic  
456 invertebrates, rather than their taxonomic identity and diversity (e.g. Larsen  
457 and Ormerod, 2010; Manfrin et al., 2016). This could in part explain the lower  
458 sensitivity of the taxonomic-based Star\_ICMi to the MQI.

459 Results from our second objective also indicated a rather poor sensitivity of  
460 the Star\_ICMi index to hydrological parameters. Analyses of flow-ecology  
461 relationship were based on a reduced sample size, because we selected  
462 those reaches for which daily discharge time-series were available from  
463 adjacent gauging stations. Nonetheless, the reaches were distributed across  
464 the whole extent of the study area and included both natural and regulated  
465 rivers and likely represented the entire range of flow parameters observed in  
466 the region. These parameters were derived at two temporal scales (1-year  
467 and 60-days preceding biological sampling) and provided similar but not  
468 identical results. When assessing the central response (using linear mixed-  
469 models), only parameters derived at 1-year time scale appeared to  
470 significantly and negatively affect the biological indicator, and included the  
471 monthly coefficient of variation in flow and the overall range and maximum  
472 daily flow. These all indicate a generally negative effect of large daily flow  
473 variation on aquatic communities, as also reported elsewhere (e.g. Bruno et  
474 al., 2010; Konrad et al., 2008; McGarvey, 2014).

475

476 It is important to highlight how focusing on the central response of  
477 macroinvertebrate metrics can provide only limited insight into the effects of  
478 streamflow. Lotic invertebrates are influenced by a wide range of abiotic and  
479 biotic factors and are unlikely to display a central or linear response to  
480 streamflow parameters (Konrad et al., 2008; Rosenfeld, 2017). In these  
481 cases, the use of quantile regressions allow the identification of those factors  
482 that appear to locally limit the maximum or minimum values of the response  
483 variable. Previous studies with benthic invertebrates have shown the validity  
484 of this approach for the identification of the environmental constraints on local  
485 community density and richness (Fornaroli et al., 2015; Lancaster and Belyea,  
486 2006). Here, we used a novel approach based on mixed quantile models and  
487 were able to identify some key flow parameters that appeared to determine  
488 the lower limits of the Star\_ICMi. Interestingly, the significant quantiles all took  
489 the form of 'negative floors', whereas no significant 'ceilings' were observed.  
490 Negative floors imply that the lower limits of the biological indicator declined  
491 with increasing values of the flow parameters. This resulted in the modelled  
492 quantiles to apparently 'track' the transition of the ecosystem into  
493 unacceptable conditions. Viewed in terms of ecological constraints, these  
494 negative floors suggest that the biological integrity was maintained within  
495 acceptable conditions (sensu WFD) by lower values of the flow parameters,  
496 which evidently represented favourable hydrologic conditions. As the value of  
497 the flow parameters increased, the hydrologic conditions deteriorated thus  
498 leading some sites to drop to a lower quality status. The identified limiting  
499 parameters were mostly related to flow variation and the frequency of flow  
500 events. Specifically, we found that high peak flows, frequent low and high  
501 pulses and large variations in daily flow (as CV) apparently acted as stressors  
502 for macroinvertebrates leading to a marked decline in the Star\_ICMi at some  
503 sites. Similar patterns were observed by Konrad et al. (2008) in 111 stream  
504 sites in the western U.S.A., where invertebrate abundance and the proportion  
505 of intolerant taxa showed quantile relations in the form of negative floors with  
506 parameters describing discharge variation.

507 Our results also parallel those Worrall et al. (2014) in showing that not only  
508 the long-term flow regime, but also short-term antecedent flow conditions can  
509 influence benthic communities. Our modelling procedure identified additional

510 flow parameters as limiting factors when derived from 60-days preceding  
511 macroinvertebrate collection. In this case, the lower values of the Star\_ICMi  
512 were limited by large daily rise rates in flow and the number of hydrologic  
513 reversals, which are also parameters quantifying hydrologic variations.  
514 It should be noted that most reaches characterised by higher values of the  
515 limiting flow parameters (e.g. yearly CV, frequent high and low pulses,  
516 reversals) were located downstream of hydropower plants, albeit at different  
517 distances. Hydropower operations in the region are known to affect the  
518 natural flow variability by often increasing the frequency and amplitude of flow  
519 oscillations and sharp transitions (Zolezzi et al., 2009). Therefore, the  
520 identified limiting flow parameters were likely outside their natural range of  
521 variability, and thus represented stressing factors for the communities.

522

523 The large scatter or variance in the relation between the Star\_ICMi and flow  
524 parameters clearly indicates the influence of additional limiting factors (e.g.  
525 water quality and altitude, as seen here). Disentangling the different source of  
526 variation in these cases can be challenging as these can include both natural  
527 and anthropogenic factors as well as biotic and abiotic processes. In these  
528 cases, the use of quantile modelling has offered clear advantages (Fornaroli  
529 et al., 2015; Konrad et al., 2008), as also observed in the present study. We  
530 specifically attempted to quantify the influence of other covariates on the  
531 observed flow-ecology relationship using the multivariate Procrustes analysis  
532 and the associated residuals vector. We used Procrustes to first associate the  
533 matrices of flow parameters and macroinvertebrate communities (sites x taxa  
534 densities). Then, we derived the vector of residuals that quantified the  
535 mismatch between homologous observations (sites) in the multivariate space  
536 defined by the two matrices (Lisboa et al., 2014). This residuals vector  
537 showed a significant and negative correlation with altitude. This means not  
538 only that altitude acted as an important covariate, but also that the match  
539 between the biota and the hydrology was stronger in upland reaches  
540 compared to lowlands. Upland reaches were likely less influenced by potential  
541 confounding factors related to human activity, including nutrient inputs and  
542 land use conversion, and the influence of streamflow characteristics on local  
543 communities was evidently stronger.

544 This contingency has wider implications for the development of general flow-  
545 ecology relationships in the area and potentially across Europe, where  
546 analogous biological indicators are adopted in line with the WFD requirements  
547 (Buffagni et al., 2006), and further emphasises the need for research and  
548 management that acknowledges the complexity of multiple stressors acting on  
549 river ecosystems (Ormerod et al., 2010).

550

## 551 **5. Conclusions**

552 In this study, we used data from a large Alpine river network to assess the  
553 relation among different WFD quality elements and to contribute to the  
554 development of evidence-based ecological flows. This was also motivated by  
555 the warning from the European commission (WFD CIS, 2015) stating that “in  
556 cases where hydrological alterations are likely to prevent the achievement of  
557 environmental objectives, the assessment of the gap between the current flow  
558 regime and the ecological flow is a critical step to inform the design of the  
559 programme of measures”.

560 Our results suggest that existing macroinvertebrate-based biological  
561 indicators, like the Star\_ICMi used as a case study and prescribed by the  
562 Italian national legislation, may mostly reflect local physico-chemical water  
563 quality and to a lesser extent the morphological integrity of the reaches, as  
564 expressed here by the LIMeco and MQI descriptors, respectively. This result  
565 was expected given previous observations and the known sensitivity of the  
566 index to organic pollution (Azzellino et al., 2015; Quadroni et al., 2017). As  
567 such, the Star\_ICMi showed rather poor correlations with flow parameters  
568 when examined in its central response. Nonetheless, quantile modelling  
569 allowed the identification of key flow parameters that limited the minimum  
570 scores of the index (i.e. ‘negative floors’), and apparently tracked the  
571 transition of the ecosystem into unacceptable conditions. The identification of  
572 these flow limits can aid the implementation of E-flows by allowing managers  
573 to compare local conditions with the given limits and set hydrologic thresholds  
574 over which ecological impairment is likely to occur. In the study area, most of  
575 the negative limits identified were related to the magnitude and frequency of  
576 flow variations, which were likely altered by upstream hydropower operations.  
577 However, as also emphasised by Konrad et al. (2008), these limits show that

578 the biological response to local hydrologic characteristics is contingent upon a  
579 range of local and regional factors including both natural (e.g. altitude) and  
580 anthropogenic ones (water quality), as demonstrated here by the Procrustes  
581 analysis. This has clear implications for both fundamental flow-ecology  
582 research and for water management, because the response of biological  
583 communities and associated indicators to flow regulation cannot be predicted  
584 without detailed information on the wider environmental setting of a river  
585 reach.

586 Although some important limiting hydrologic parameters were identified,  
587 results from the present study imply caution is needed in using the current  
588 WFD biological indicators based on analogous principles to the one adopted  
589 in Italy, especially to guide the management of ecological flows. Further  
590 research is needed to better quantify flow-ecology relationships and develop  
591 hydrology-sensitive indicators. Similar efforts were pursued by other countries  
592 where empirical waterflow preferences of benthic invertebrates were  
593 synthesised into a river flow index (e.g. LIFE index; Extence et al., 1999).  
594 However, the validity of the LIFE index in other environmental settings needs  
595 to be tested (Dunbar et al., 2010) and, more generally, the index is designed  
596 to reflect changes in flow velocity and might correlate poorly with other flow  
597 parameters likely affected by river regulation (i.e. frequency and magnitude of  
598 variation). Ideally, effort and resources should be directed to the development  
599 of ecological indicators targeting specific flow characteristics that are most  
600 likely altered by river regulation and water uses.

601

## 602 **6. Acknowledgements**

603 This project has received funding from the European Union's Horizon 2020  
604 research and innovation programme under the Marie Skłodowska-Curie Grant  
605 Agreement No. 748969, awarded to SL. The authors want to thank the  
606 Environmental Agency of the Autonomous Province of Trento (APPA-TN) and  
607 the Environmental Agency of the Autonomous Province of Bolzano (APPA-  
608 BZ) for providing the STAR-ICMi, LIMECO and MQI datasets; the Hydro  
609 offices for providing the hydrological data; Elisa Stella (University of Trento)  
610 for providing the stream network and hydropower dams GIS data.

611

## 612 7. References

613

- 614 Allan, J.D., 1995. Stream Ecology: Structure and function of running waters.  
615 Springer Netherlands.
- 616 Azzellino, A., Canobbio, S., Çervigen, S., Marchesi, V., Piana, A., 2015.  
617 Disentangling the multiple stressors acting on stream ecosystems to  
618 support restoration priorities. *Water Science & Technology* 72, 293.  
619 <https://doi.org/10.2166/wst.2015.177>
- 620 Bartoń, K., 2018. MuMIn: Multi-Model Inference.
- 621 Belmar, O., Vila-Martínez, N., Ibáñez, C., Caiola, N., 2018. Linking fish-based  
622 biological indicators with hydrological dynamics in a Mediterranean  
623 river: Relevance for environmental flow regimes. *Ecological Indicators* 95,  
624 492–501. <https://doi.org/10.1016/j.ecolind.2018.06.073>
- 625 Booker, D.J., Snelder, T.H., Greenwood, M.J., Crow, S.K., 2015. Relationships  
626 between invertebrate communities and both hydrological regime and  
627 other environmental factors across New Zealand's rivers. *Ecohydrology* 8,  
628 13–32. <https://doi.org/10.1002/eco.1481>
- 629 Bruno, M.C., Maiolini, B., Carolli, M., Silveri, L., 2010. Short time-scale impacts of  
630 hydropeaking on benthic invertebrates in an Alpine stream (Trentino,  
631 Italy). *Limnologica - Ecology and Management of Inland Waters* 40, 281–  
632 290. <https://doi.org/10.1016/j.limno.2009.11.012>
- 633 Buffagni, A., Erba, S., 2007. Macroinvertebrati acquatici e direttiva 200/60/EC  
634 (WFD). *Notiziario dei Metodi Analitici* 1, 94–100.
- 635 Buffagni, A., Erba, S., Cazzola, M., Murray-Bligh, J., Soszka, H., Genoni, P., 2006.  
636 The STAR common metrics approach to the WFD intercalibration  
637 process: Full application for small, lowland rivers in three European  
638 countries. *Hydrobiologia* 566, 379. <https://doi.org/10.1007/s10750-006-0082-7>
- 640 Cade, B.S., Noon, B.R., 2003. A gentle introduction to quantile regression for  
641 ecologists. *Frontiers in Ecology and the Environment* 1, 412–420.
- 642 Davies, P.M., Naiman, R.J., Warfe, D.M., Pettit, N.E., Arthington, A.H., Bunn, S.E.,  
643 2014. Flow–ecology relationships: closing the loop on effective  
644 environmental flows. *Marine and Freshwater Research* 65, 133.  
645 <https://doi.org/10.1071/MF13110>
- 646 De Pauw, N., Gabriels, W., Goethals, P.L.M., 2006. River Monitoring and  
647 Assessment Methods Based on Macroinvertebrates, in: *Biological*  
648 *Monitoring of Rivers*. Wiley-Blackwell, pp. 111–134.  
649 <https://doi.org/10.1002/0470863781.ch7>
- 650 Dunbar, M.J., Pedersen, M.L., Cadman, D., Extence, C., Waddingham, J., Chadd, R.,  
651 Larsen, S.E., 2010. River discharge and local-scale physical habitat  
652 influence macroinvertebrate LIFE scores: Discharge, physical habitat  
653 influence LIFE score. *Freshwater Biology* 55, 226–242.  
654 <https://doi.org/10.1111/j.1365-2427.2009.02306.x>
- 655 European Commission, 2000. Directive 2000/60/EC of 20 December 2000 of the  
656 European Union and of the Council establishing a framework for  
657 community action in the field of water policy.
- 658 Extence, C.A., Balbi, D.M., Chadd, R.P., 1999. River flow indexing using British  
659 benthic macroinvertebrates: a framework for setting hydroecological

- 660 objectives. *Regulated Rivers: Research & Management* 15, 545–574.  
661 [https://doi.org/10.1002/\(SICI\)1099-1646\(199911/12\)15:6<545::AID-](https://doi.org/10.1002/(SICI)1099-1646(199911/12)15:6<545::AID-)  
662 [RRR561>3.0.CO;2-W](https://doi.org/10.1002/(SICI)1099-1646(199911/12)15:6<545::AID-RRR561>3.0.CO;2-W)
- 663 Fornaroli, R., Cabrini, R., Sartori, L., Marazzi, F., Vraccvic, D., Mezzanotte, V.,  
664 Annala, M., Canobbio, S., 2015. Predicting the constraint effect of  
665 environmental characteristics on macroinvertebrate density and diversity  
666 using quantile regression mixed model. *Hydrobiologia* 742, 153–167.  
667 <https://doi.org/10.1007/s10750-014-1974-6>
- 668 Friberg, N., 2014. Impacts and indicators of change in lotic ecosystems. Wiley  
669 *Interdisciplinary Reviews: Water* 1, 513–531.  
670 <https://doi.org/10.1002/wat2.1040>
- 671 Friberg, N., Skriver, J., Larsen, S.E., Pedersen, M.L., Buffagni, A., 2010. Stream  
672 macroinvertebrate occurrence along gradients in organic pollution and  
673 eutrophication. *Freshwater Biology* 55, 1405–1419.  
674 <https://doi.org/10.1111/j.1365-2427.2008.02164.x>
- 675 Geraci, M., 2014. Linear Quantile Mixed Models: The lqmm Package for Laplace  
676 Quantile Regression. *Journal of Statistical Software* 57.  
677 <https://doi.org/10.18637/jss.v057.i13>
- 678 Greenwood, M.J., Booker, D.J., Smith, B.J., Winterbourn, M.J., 2016. A  
679 hydrologically sensitive invertebrate community index for New Zealand  
680 rivers. *Ecological Indicators* 61, 1000–1010.  
681 <https://doi.org/10.1016/j.ecolind.2015.10.058>
- 682 Guilpart, A., Roussel, J.-M., Aubin, J., Caquet, T., Marle, M., Le Bris, H., 2012. The  
683 use of benthic invertebrate community and water quality analyses to  
684 assess ecological consequences of fish farm effluents in rivers. *Ecological*  
685 *Indicators* 23, 356–365. <https://doi.org/10.1016/j.ecolind.2012.04.019>
- 686 Hering, D., Moog, O., Sandin, L., Verdonshot, P.F.M., 2004. Overview and  
687 application of the AQEM assessment system. *Hydrobiologia* 516, 1–20.  
688 <https://doi.org/10.1023/B:HYDR.0000025255.70009.a5>
- 689 Konrad, C.P., Brasher, A.M.D., May, J.T., 2008. Assessing streamflow  
690 characteristics as limiting factors on benthic invertebrate assemblages in  
691 streams across the western United States. *Freshwater Biology* 53, 1983–  
692 1998. <https://doi.org/10.1111/j.1365-2427.2008.02024.x>
- 693 Laini, A., Bolpagni, R., Cancellario, T., Guareschi, S., Racchetti, E., Viaroli, P., 2018.  
694 Testing the response of macroinvertebrate communities and  
695 biomonitoring indices under multiple stressors in a lowland regulated  
696 river. *Ecological Indicators* 90, 47–53.  
697 <https://doi.org/10.1016/j.ecolind.2018.02.051>
- 698 Lancaster, J., Belyea, L.R., 2006. Defining the limits to local density: alternative  
699 views of abundance-environment relationships. *Freshwater Biology* 51,  
700 783–796. <https://doi.org/10.1111/j.1365-2427.2006.01518.x>
- 701 Larsen, S., Ormerod, S.J., 2010. Combined effects of habitat modification on trait  
702 composition and species nestedness in river invertebrates. *Biological*  
703 *Conservation* 143, 2638–2646.  
704 <https://doi.org/10.1016/j.biocon.2010.07.006>
- 705 Lisboa, F.J.G., Peres-Neto, P.R., Chaer, G.M., Jesus, E. da C., Mitchell, R.J., Chapman,  
706 S.J., Barbara, R.L.L., 2014. Much beyond Mantel: Bringing Procrustes  
707 Association Metric to the Plant and Soil Ecologist's Toolbox. *PLOS ONE* 9,  
708 e101238. <https://doi.org/10.1371/journal.pone.0101238>

- 709 Manfrin, A., Traversetti, L., Pilotto, F., Larsen, S., Scalici, M., 2016. Effect of spatial  
710 scale on macroinvertebrate assemblages along a Mediterranean river.  
711 *Hydrobiologia* 765, 185–196. [https://doi.org/10.1007/s10750-015-](https://doi.org/10.1007/s10750-015-2412-0)  
712 [2412-0](https://doi.org/10.1007/s10750-015-2412-0)
- 713 Matthaei, C.D., Arbuckle, C.J., Townsend, C.R., 2000. Stable surface stones as  
714 refugia for invertebrates during disturbance in a New Zealand stream.  
715 *Journal of the North American Benthological Society* 19, 82–93.  
716 <https://doi.org/10.2307/1468283>
- 717 McGarvey, D.J., 2014. Moving beyond species–discharge relationships to a flow-  
718 mediated, macroecological theory of fish species richness. *Freshwater*  
719 *Science* 33, 18–31. <https://doi.org/10.1086/674967>
- 720 Monk, W.A., Wood, P.J., Hannah, D.M., Wilson, D.A., Extence, C.A., Chadd, R.P.,  
721 2006. Flow variability and macroinvertebrate community response  
722 within riverine systems. *River Research and Applications* 22, 595–615.  
723 <https://doi.org/10.1002/rra.933>
- 724 Naiman, R.J., Décamps, H., 1997. The Ecology of Interfaces: Riparian Zones.  
725 *Annual Review of Ecology and Systematics* 28, 621–658.  
726 <https://doi.org/10.1146/annurev.ecolsys.28.1.621>
- 727 Nebra, A., Caiola, N., Muñoz-Camarillo, G., Rodríguez-Climent, S., Ibáñez, C., 2014.  
728 Towards a suitable ecological status assessment of highly stratified  
729 mediterranean estuaries: A comparison of benthic invertebrate fauna  
730 indices. *Ecological Indicators* 46, 177–187.  
731 <https://doi.org/10.1016/j.ecolind.2014.06.023>
- 732 Ormerod, S.J., Dobson, M., Hildrew, A.G., Townsend, C.R., 2010. Multiple stressors  
733 in freshwater ecosystems. *Freshwater Biology* 55, 1–4.  
734 <https://doi.org/10.1111/j.1365-2427.2009.02395.x>
- 735 Pinheiro, J., Bates, D., Saikat, D., R-core, 2018. nlme: Linear and Nonlinear Mixed  
736 Effects Models.
- 737 Poff, N.L., Allan, J.D., Bain, M.B., Karr, J.R., Prestegard, K.L., Richter, B.D., Sparks,  
738 R.E., Stromberg, J.C., 1997. The Natural Flow Regime. *BioScience* 47, 769–  
739 784. <https://doi.org/10.2307/1313099>
- 740 Poff, N.L., Zimmerman, J.K.H., 2010. Ecological responses to altered flow regimes:  
741 a literature review to inform the science and management of  
742 environmental flows: Review of altered flow regimes. *Freshwater Biology*  
743 55, 194–205. <https://doi.org/10.1111/j.1365-2427.2009.02272.x>
- 744 Quadroni, S., Crosa, G., Gentili, G., Espa, P., 2017. Response of stream benthic  
745 macroinvertebrates to current water management in Alpine catchments  
746 massively developed for hydropower. *Science of The Total Environment*  
747 609, 484–496. <https://doi.org/10.1016/j.scitotenv.2017.07.099>
- 748 R Core Team, 2017. R: A language and environment for statistical computing.  
749 Vienna.
- 750 Richter, B., Baumgartner, J., Wigington, R., Braun, D., 1997. How much water does  
751 a river need? *Freshwater Biology* 37, 231–249.  
752 <https://doi.org/10.1046/j.1365-2427.1997.00153.x>
- 753 Rinaldi, M., Surian, N., Comiti, F., Bussetini, M., 2013. A method for the  
754 assessment and analysis of the hydromorphological condition of Italian  
755 streams: The Morphological Quality Index (MQI). *Geomorphology* 180–  
756 181, 96–108. <https://doi.org/10.1016/j.geomorph.2012.09.009>



- 757 Rosenberg, D.M., Resh, V.H. (Eds.), 1993. Freshwater Biomonitoring and Benthic  
758 Macroinvertebrates. Springer US.
- 759 Rosenfeld, J.S., 2017. Developing flow–ecology relationships: Implications of  
760 nonlinear biological responses for water management. *Freshwater*  
761 *Biology* 62, 1305–1324. <https://doi.org/10.1111/fwb.12948>
- 762 Salmaso, F., Crosa, G., Espa, P., Gentili, G., Quadroni, S., Zaccara, S., 2018. Benthic  
763 macroinvertebrates response to water management in a lowland river:  
764 effects of hydro-power vs irrigation off-stream diversions. *Environmental*  
765 *Monitoring and Assessment* 190. [https://doi.org/10.1007/s10661-017-](https://doi.org/10.1007/s10661-017-6390-8)  
766 [6390-8](https://doi.org/10.1007/s10661-017-6390-8)
- 767 Schneider, S.C., Petrin, Z., 2017. Effects of flow regime on benthic algae and  
768 macroinvertebrates - A comparison between regulated and unregulated  
769 rivers. *Science of The Total Environment* 579, 1059–1072.  
770 <https://doi.org/10.1016/j.scitotenv.2016.11.060>
- 771 Spitale, D., Bruno, M.C., 2018. Criticità nella determinazione del Deflusso  
772 Ecologico in Italia mediante gli invertebrati bentonici. *Biologia*  
773 *Ambientale* 7.
- 774 Stewart-Koster, B., Olden, J.D., Gido, K.B., 2014. Quantifying flow–ecology  
775 relationships with functional linear models. *Hydrological Sciences Journal*  
776 59, 629–644. <https://doi.org/10.1080/02626667.2013.860231>
- 777 Tonkin, J.D., Jähnig, S.C., Haase, P., 2014. The Rise of Riverine Flow-ecology and  
778 Environmental Flow Research. *Environmental Processes* 1, 323–330.  
779 <https://doi.org/10.1007/s40710-014-0024-8>
- 780 Verdonshot, P.F.M., Moog, O., 2006. Tools for assessing European streams with  
781 macroinvertebrates: major results and conclusions from the STAR  
782 project. *Hydrobiologia* 566, 299–309. [https://doi.org/10.1007/s10750-](https://doi.org/10.1007/s10750-006-0088-1)  
783 [006-0088-1](https://doi.org/10.1007/s10750-006-0088-1)
- 784 WFD CIS, 2015. Guidance Document No. 31 - Ecological Flows in the  
785 Implementation of the Water Framework Directive. Technical Report -  
786 2015 - 086.
- 787 Worrall, T.P., Dunbar, M.J., Extence, C.A., Laizé, C.L.R., Monk, W.A., Wood, P.J.,  
788 2014. The identification of hydrological indices for the characterization of  
789 macroinvertebrate community response to flow regime variability.  
790 *Hydrological Sciences Journal* 59, 645–658.  
791 <https://doi.org/10.1080/02626667.2013.825722>
- 792 Zolezzi, G., Bellin, A., Bruno, M.C., Maiolini, B., Siviglia, A., 2009. Assessing  
793 hydrological alterations at multiple temporal scales: Adige River, Italy.  
794 *Water Resources Research* 45. <https://doi.org/10.1029/2008WR007266>  
795
- 796
- 797
- 798
- 799
- 800
- 801
- 802
- 803

804 **SUPPLEMENTARY MATERIAL**

805

806 **Appendix A**

807 Description of the STAR\_ICMi index (adapted from [http://www.life-inhabit.it/cnr-](http://www.life-inhabit.it/cnr-irsa-activities/en/cnr-irsa-activities-related-inhabit/ecological-status/staricmi)

808 [irsa-activities/en/cnr-irsa-activities-related-inhabit/ecological-status/staricmi](http://www.life-inhabit.it/cnr-irsa-activities-related-inhabit/ecological-status/staricmi),

809 Buffagni et al., 2005, 2007, 2008).

810

811 The STAR\_ICMi is a multimetric index which includes six metrics:

- 812 1. Average Score Per Taxon (Armitage et al., 1983);
- 813 2. Log<sub>10</sub>(sel\_EPTD+1): Log<sub>10</sub> (sum of Heptageniidae, Ephemeridae,  
814 Leptophlebiidae, Brachycentridae, Goeridae, Polycentropodidae,  
815 Limnephilidae, Odontoceridae, Dolichopodidae, Stratyomidae, Dixidae,  
816 Empididae, Athericidae & Nemouridae;
- 817 3. 1-GOLD 1:1 - (relative abundance of Gastropoda, Oligochaeta and Diptera);
- 818 4. Number of EPT families;
- 819 5. Total number of families
- 820 6. Shannon-Weiner diversity index.

821 The calculation of the STAR\_ICMi is performed in 4 steps:

- 822 1. calculation of the raw value for each of the 6 metrics;
- 823 2. calculation of the Ecological Quality Ratio for each of the 6 metrics by  
824 dividing the observed value (i.e. obtained for the considered samples) by the  
825 median value of the metric calculated from the reference river type;
- 826 3. calculation of the weighted average of the EQR using a specifically assigned  
827 weight for each metric (0.333, 0.266, 0.067, 0.167, 0.083, 0.083, respectively  
828 for metrics 1-6);
- 829 4. normalization of the obtained value by dividing the value of the considered  
830 sample by the STAR\_ICMi expected in reference samples.

831 Values of STAR\_ICMi vary between 0 and +1, and different intervals correspond to  
832 the five quality classes defined by the Water Framework Directive: high, good,  
833 moderate, bad, poor.

834

835

836

837

838

839 SUPPLEMENTARY FIGURES

840

841

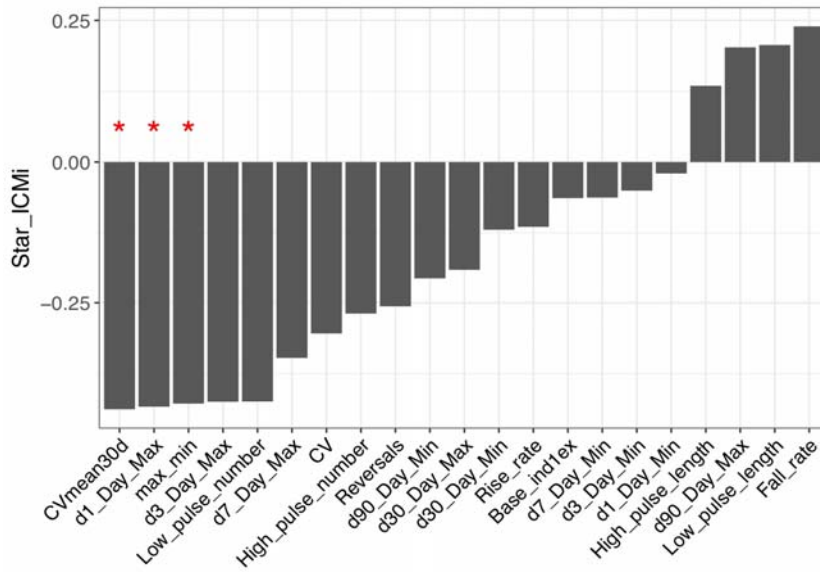

842

843 **Supplementary Figure S1** - Correlation coefficients between the Star\_ICMi and flow

844 parameters calculated from 1-year flow-series preceding the biological sampling.

845 Only three flow parameters showed significant correlation (red stars) based on linear

846 mixed models.

847

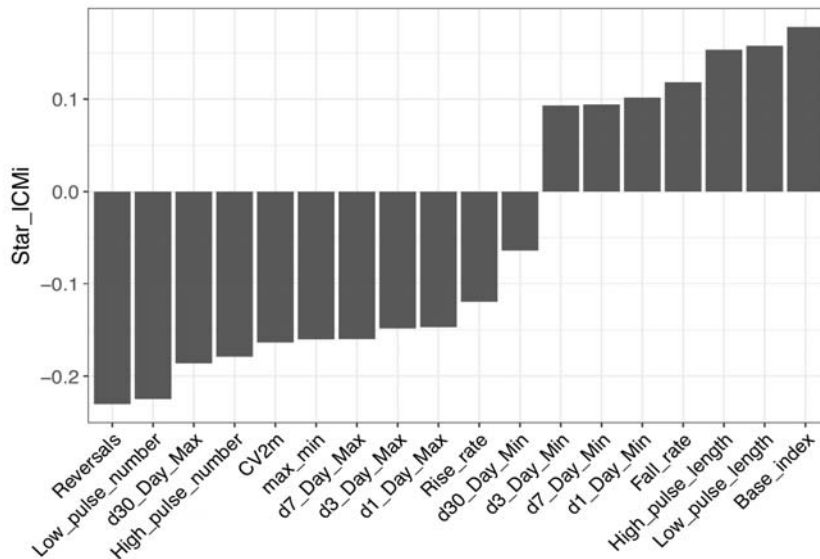

848

849 **Supplementary Figure S2** - Correlation coefficients between the Star\_ICMi and flow

850 parameters calculated from 60-days flow-series preceding the biological sampling.

851 No significant correlation was observed based on mixed models.

852

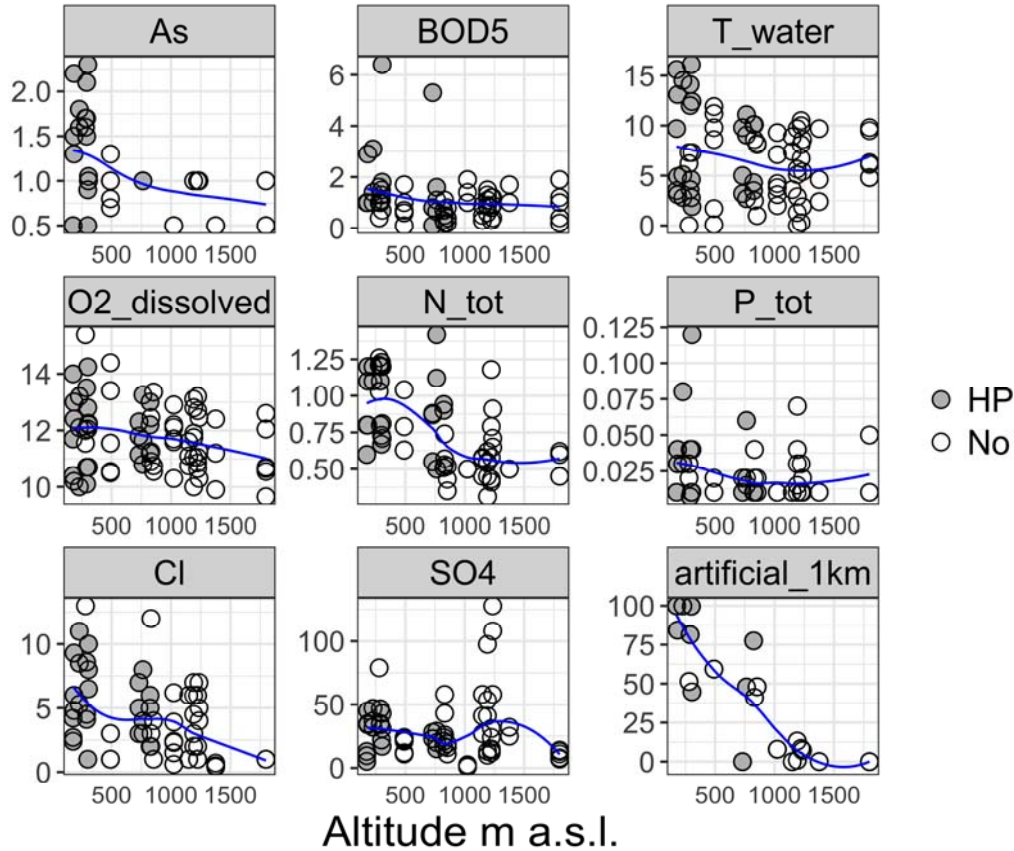

853

854

855

856

857

858

859

860

861

**Supplementary Figure S3** - Relationship between altitude and main physico-chemical parameters and local land use across the study reaches used in the flow-ecology analysis. Grey circles = reaches affected by hydropower upstream (HP); white circles = reaches not affected by hydropower (No)
